# Supplementary material
Source: MDPI journal article supplement (https://www.mdpi.com/2076-0787/13/1/38)
Supplement: s1 [file s1]

Table S1: **Definitions and sources:** Definitions and sources for the different at-risk species classifications under the Endangered Species Act (ESA), Species At Risk Act (SARA), IUCN Red List, BC Wildlife Act and Washington State Listed Species.

| Act                          | Location | Listing category      | Definition                                                                                                                                                                                                                                                                                        | Source                                             |
|------------------------------|----------|-----------------------|---------------------------------------------------------------------------------------------------------------------------------------------------------------------------------------------------------------------------------------------------------------------------------------------------|----------------------------------------------------|
| Endangered Species Act (ESA) | USA      | Candidate species     | A species for which there is sufficient information on their biological status and threats to propose them as endangered or threatened, but other higher priority listing activities mean the species has not yet been listed. Or a species that is currently under review for potential listing. | Office of Protected Resources (2023), USFWS (2017) |
|                              |          | Threatened            | A species that is likely to become endangered in the foreseeable future throughout all or a significant portion of its range                                                                                                                                                                      | Smith et al. (2018)                                |
|                              |          | Endangered            | A species in danger of extinction throughout all or a significant portion of its range                                                                                                                                                                                                            | Smith et al. (2018)                                |
| Species at Risk Act (SARA)   | Canada   | Special Concern       | A species that may become a threatened or an endangered species because of a combination of biological characteristics or identified threats                                                                                                                                                      | ECCC (2014), SARA (2002)                           |
|                              |          | Threatened            | A wildlife species that is likely to become endangered if nothing is done to reverse the factors leading to its extirpation or extinction                                                                                                                                                         |                                                    |
|                              |          | Endangered            | A wildlife species that is facing imminent extirpation or extinction                                                                                                                                                                                                                              |                                                    |
|                              |          | Extinct/Extirpated    | <i>Extinct</i> : a wildlife species that no longer exists<br><i>Extirpated</i> : a wildlife species that no longer exists in the wild in Canada, but exists elsewhere in the world                                                                                                                |                                                    |
|                              |          | Data Deficient        | Not enough information available for classification                                                                                                                                                                                                                                               |                                                    |
| IUCN Red List                | Global   | Least Concern         | A species that does not qualify for Critically Endangered, Endangered, Vulnerable or Near Threatened                                                                                                                                                                                              | IUCN (2012, 2022)                                  |
|                              |          | Near Threatened       | A species that... 'is close to qualifying for or is likely to qualify for a threatened category in the near future'                                                                                                                                                                               |                                                    |
|                              |          | Vulnerable            | A species that 'meets any of the criteria A to E for Vulnerable, and it is therefore considered to be facing a high risk of extinction in the wild' (for 'criteria A to E' see IUCN (2012))                                                                                                       |                                                    |
|                              |          | Endangered            | A species that 'meets any of the criteria A to E for Endangered, and it is therefore considered to be facing a very high risk of extinction in the wild'                                                                                                                                          |                                                    |
|                              |          | Critically Endangered | A species that 'meets any of the criteria A to E for Critically Endangered, and it is therefore considered to be facing an extremely high risk of extinction in the wild'                                                                                                                         |                                                    |

|                                          |                          |                        |                                                                                                                                                                                                                      |                                                                |
|------------------------------------------|--------------------------|------------------------|----------------------------------------------------------------------------------------------------------------------------------------------------------------------------------------------------------------------|----------------------------------------------------------------|
|                                          |                          | Extinct in the Wild    | A species 'known only to survive in cultivation, in captivity or as a naturalised population...when exhaustive surveys in known and/or expected habitat, at appropriate times...have failed to record an individual' |                                                                |
|                                          |                          | Extinct                | 'When there is no reasonable doubt that the last individual has died' and 'When exhaustive surveys in known and/or expected habitat, at appropriate times...have failed to record an individual'                     |                                                                |
|                                          |                          | Data Deficient         | If there is 'Inadequate information to make a direct, or indirect, assessment...based on its distribution and/or population status'                                                                                  |                                                                |
| British Columbia Wildlife Act            | British Columbia, Canada | Red List               | Any species or ecosystem that is at risk of being lost (extirpated, endangered or threatened). Includes those assumed extirpated, historical/possibly extirpated, critically imperilled and imperilled               | Harper et al. (1994), Master et al. (2012), NatureServe (2023) |
|                                          |                          | Blue List              | Any species or ecosystem that is of special concern. Includes species of special concern, vulnerable to extirpation or extinction                                                                                    |                                                                |
|                                          |                          | Yellow List            | Any species or ecosystem that is apparently secure or secure (least risk of being lost) e.g. demonstrably widespread or abundant                                                                                     |                                                                |
| Washington Priority Habitats and Species | Washington State, USA    | Endangered             | Seriously threatened with extinction throughout all or a significant portion of its range                                                                                                                            | Department of Fish and Wildlife (2023)                         |
|                                          |                          | Protected – Threatened | Likely to become endangered within the foreseeable future throughout a significant portion of its range without cooperative management or removal of threats                                                         |                                                                |
|                                          |                          | Protected – Sensitive  | Vulnerable or declining and likely to become endangered or threatened in a significant portion of its range within the state without cooperative management or removal of threats                                    |                                                                |

Table S2: **Population-level listings:** Species with specific populations listed under species-at-risk legislation on either one or both sides of the US-Canada border, and their respective Species At Risk Act (SARA), Endangered Species Act (ESA) and IUCN classifications. Where a population is specific in brackets, the species is only listed for that population but where there are no populations specified, the species is listed in its entirety/across the whole country. All IUCN classifications are at a species level.

| Species                                                | SARA                                                                                                                                                | ESA                                                            | IUCN            |
|--------------------------------------------------------|-----------------------------------------------------------------------------------------------------------------------------------------------------|----------------------------------------------------------------|-----------------|
| <b>Steller sea lion</b><br><i>Eumetopias jubatus</i>   | Special concern                                                                                                                                     | Endangered (Western DPS)                                       | Near Threatened |
| <b>Bowhead whale</b><br><i>Balaena mysticetus</i>      | Special concern<br>(Bering-Chukchi-Beaufort population)                                                                                             | Endangered                                                     | Least Concern   |
| <b>Sei whale</b> <i>Balaenoptera borealis</i>          | Endangered (Pacific population)                                                                                                                     | Endangered                                                     | Endangered      |
| <b>Blue whale</b><br><i>Balaenoptera musculus</i>      | Endangered (Atlantic and Pacific populations)                                                                                                       | Endangered                                                     | Endangered      |
| <b>Fin whale</b> <i>Balaenoptera physalus</i>          | Threatened (Pacific population)<br>Special concern (Atlantic population)                                                                            | Endangered                                                     | Vulnerable      |
| <b>Beluga whale</b><br><i>Delphinapterus leucas</i>    | Endangered (St. Lawrence Estuary population)<br>Threatened (Cumberland Sound population)                                                            | Endangered (Cook Inlet DPS)                                    | Least Concern   |
| <b>Grey whale</b> <i>Eschrichtius robustus</i>         | Extirpated (Atlantic population)<br>Special concern (Eastern North Pacific population)                                                              | Endangered (Western North Pacific DPS)                         | Least Concern   |
| <b>Humpback whale</b><br><i>Megaptera novaeangliae</i> | Special concern (Subspecies <i>kuzira</i> in North Pacific population)                                                                              | Endangered (Central America DPS and Western North Pacific DPS) | Least Concern   |
| <b>Killer whale</b> <i>Orcinus orca</i>                | Endangered (Northeast Pacific southern resident population)<br>Threatened (Northeast Pacific northern resident, offshore and transient populations) | Endangered (Southern Resident DPS)                             | Data Deficient  |
| <b>Caribou</b> <i>Rangifer tarandus caribou</i>        | Threatened (Southern Mountain population)<br>Special concern (Northern Mountain population)                                                         | Endangered (Southern Mountain DPS)                             | Not listed      |
| <b>Grizzly bear</b> <i>Ursus arctos</i>                | Special concern (Western population)                                                                                                                | Threatened                                                     | Least Concern   |

Table S3: **Canadian federal vs provincial listings:** A comparison of species' listings at a federal versus provincial level in Canada, for those species that exist in British Columbia. Listings are shown for the Species At Risk Act (SARA), the British Columbia List and the corresponding British Columbia Conservation Status Rank. Note: some instances where a specific subspecies is not listed in one legislation, but the species is. See notes for specific information.

| Species                                                      | SARA status     | BC list                | BC Conservation Status Rank                                                                                        | Notes                                                                                                                     |
|--------------------------------------------------------------|-----------------|------------------------|--------------------------------------------------------------------------------------------------------------------|---------------------------------------------------------------------------------------------------------------------------|
| <b>Pallid bat</b> <i>Antrozous pallidus</i>                  | Threatened      | Red                    | S2: Imperilled                                                                                                     |                                                                                                                           |
| <b>Mountain beaver</b> <i>Aplodontia rufa</i>                | Special Concern | Yellow                 | S4: Apparently Secure                                                                                              |                                                                                                                           |
| <b>Wood bison</b> <i>Bison bison athabasca</i>               | Threatened      | Red                    | S2: Imperilled                                                                                                     |                                                                                                                           |
| <b>Eastern wolf</b> <i>Canis lupus lycaon</i>                | Special Concern | Subspecies not on list | Subspecies not on list                                                                                             | Grey wolf as a species in BC is apparently secure and on Yellow list but the Eastern wolf subspecies does not occur in BC |
| <b>Sea otter</b> <i>Enhydra lutris</i>                       | Special Concern | Blue                   | S3: Special Concern                                                                                                |                                                                                                                           |
| <b>North Pacific right whale</b> <i>Eubalaena japonica</i>   | Endangered      | Red                    | S1: Critically Imperilled                                                                                          |                                                                                                                           |
| <b>Spotted bat</b> <i>Euderma maculatum</i>                  | Special Concern | Blue                   | S3S4: Special Concern /Apparently Secure                                                                           |                                                                                                                           |
| <b>Steller sea lion</b> <i>Eumetopias jubatus</i>            | Special Concern | Blue                   | S3S4B: Breeding population of Special Concern /Apparently Secure<br>S4N: Non-breeding population Apparently Secure |                                                                                                                           |
| <b>Wolverine</b> <i>Gulo gulo</i>                            | Special Concern | No status              | S3: Special Concern                                                                                                | No status because subspecies <i>luscus</i> (blue list) and <i>vancouverensis</i> (red list) have their own designation    |
| <b>Vancouver Island marmot</b> <i>Marmota vancouverensis</i> | Endangered      | Red                    | S1: Critically Imperilled                                                                                          |                                                                                                                           |
| <b>Haide ermine</b> <i>Mustela haidarum</i>                  | Threatened      | Red                    | S2: Imperilled                                                                                                     |                                                                                                                           |

|                                                                                                        |                 |                      |                                         |                                                    |
|--------------------------------------------------------------------------------------------------------|-----------------|----------------------|-----------------------------------------|----------------------------------------------------|
| <b>Little brown myotis</b><br><i>Myotis lucifugus</i>                                                  | Endangered      | Blue                 | S3S4: Special Concern/Apparently Secure |                                                    |
| <b>Northern myotis</b><br><i>Myotis septentrionalis</i>                                                | Endangered      | Blue                 | S2S3: Imperilled/Special Concern        |                                                    |
| <b>Collared pika</b><br><i>Ochotona collaris</i>                                                       | Special Concern | Blue                 | S3S4: Special Concern/Apparently Secure |                                                    |
| <b>Western harvest mouse <i>megalotis</i> subspecies</b><br><i>Reithrodontomys megalotis megalotis</i> | Special Concern | Species on Blue List | Species is S3: Special Concern          | Occurs in BC but subspecies has no specific status |
| <b>Townsend's mole</b><br><i>Scapanus townsendii</i>                                                   | Endangered      | Red                  | S1: Critically Imperilled               |                                                    |
| <b>Pacific water shrew</b><br><i>Sorex bendirii</i>                                                    | Endangered      | Red                  | S2: Imperilled                          | Inexact or uncertain numeric rank                  |
| <b>Nuttall's cottontail</b><br><i>Sylvilagus nuttallii nuttallii</i>                                   | Special Concern | Species on Blue List | Species is S3: Special Concern          | Occurs in BC but subspecies has no specific status |
| <b>Plains bison</b> <i>Bos bison bison</i>                                                             | Not listed      | Red                  | SX: Presumed extirpated                 |                                                    |
| <b>Northern fur seal</b><br><i>Callorhinus ursinus</i>                                                 | Not listed      | Red                  | S2M: Migratory population imperilled    |                                                    |
| <b>Roosevelt elk</b> <i>Cervus elaphus roosevelti</i>                                                  | Not listed      | Blue                 | S3S4: Special Concern/Apparently Secure |                                                    |
| <b>Townsend's big-eared bat</b><br><i>Corynorhinus townsendii</i>                                      | Not listed      | Blue                 | S3: Special Concern                     |                                                    |
| <b>Hoary bat</b> <i>Lasiurus cinereus</i>                                                              | Not listed      | Blue                 | S3S4: Special Concern/Apparently Secure |                                                    |
| <b>Snowshoe hare <i>washingtonii</i> subspecies</b> <i>Lepus americanus washingtonii</i>               | Not listed      | Red                  | S1: Critically Imperilled               |                                                    |
| <b>White-tailed jackrabbit</b> <i>Lepus townsendii</i>                                                 | Not listed      | Red                  | SX: Presumed extirpated                 |                                                    |
| <b>Townsend's vole <i>cowani</i> subspecies</b><br><i>Microtus townsendii cowani</i>                   | Not listed      | Red                  | S1: Critically Imperilled               |                                                    |

|                                                                                                                                                        |            |                 |                                                                                                |                                   |
|--------------------------------------------------------------------------------------------------------------------------------------------------------|------------|-----------------|------------------------------------------------------------------------------------------------|-----------------------------------|
| <b>Northern elephant seal</b> <i>Mirounga angustirostris</i>                                                                                           | Not listed | Red             | S1B, S4N: Breeding population Critically Imperilled, non-breeding population Apparently Secure |                                   |
| <b>Long-tailed weasel</b> <i>altifrontalis</i><br><b>subspecies</b> <i>Mustela frenata altifrontalis</i>                                               | Not listed | Red             | SH: Possibly Extirpated                                                                        |                                   |
| <b>Ermine</b> <i>anguinae</i><br><b>subspecies</b> <i>Mustela richardsonii anguinae</i>                                                                | Not listed | Blue            | S3: Special Concern                                                                            |                                   |
| <b>Southern red-backed vole</b><br><b>subspecies</b> <i>Myodes gapperi</i><br>- <i>galei</i><br>- <i>occidentalis</i>                                  | Not listed | Blue<br><br>Red | S3S4: Special Concern/Apparently Secure<br>S1: Critically Imperilled                           |                                   |
| <b>Western small-footed myotis</b> <i>Myotis ciliolabrum</i>                                                                                           | Not listed | Blue            | S3S4: Special Concern/Apparently Secure                                                        |                                   |
| <b>Yuma myotis</b> <i>Myotis yumanensis</i>                                                                                                            | Not listed | Blue            | S3: Special Concern                                                                            |                                   |
| <b>Least chipmunk</b><br><b>subspecies</b><br><i>Neotamias minimus</i><br>- <i>oreocetes</i><br>- <i>selkirki</i>                                      | Not listed | Blue<br>Red     | S3: Special Concern<br>S1: Critically Imperilled                                               |                                   |
| <b>Red-tailed chipmunk</b> <i>ruficaudus</i> and <i>simulans</i> subspecies<br><i>Neotamias ruficaudus</i><br>- <i>ruficaudus</i><br>- <i>simulans</i> | Not listed | Red<br>Blue     | S2: Imperilled<br><br>S3: Special Concern                                                      |                                   |
| <b>Mountain goat</b> <i>Oreamnos americanus</i>                                                                                                        | Not listed | Blue            | S3: Special Concern                                                                            |                                   |
| <b>Bighorn sheep</b> <i>Ovis canadensis</i>                                                                                                            | Not listed | Blue            | S3: Special Concern                                                                            | Inexact or uncertain numeric rank |
| <b>Dall's sheep</b> <i>Ovis dalli dalli</i>                                                                                                            | Not listed | Blue            | S2S3: Imperilled/Special Concern                                                               |                                   |
| <b>Stone's sheep</b> <i>Ovis dalli stonei</i>                                                                                                          | Not listed | Blue            | S3S4: Special Concern/Apparently Secure                                                        |                                   |
| <b>Fisher</b> <i>Pekania pennanti</i>                                                                                                                  | Not listed | Blue            | S3: Special Concern                                                                            |                                   |

|                                                                                                                     |            |      |                                             |                                   |
|---------------------------------------------------------------------------------------------------------------------|------------|------|---------------------------------------------|-----------------------------------|
| <ul style="list-style-type: none"> <li>- <b>Boreal population</b></li> <li>- <b>Columbian population</b></li> </ul> |            | Red  | S2: Imperilled                              |                                   |
| <b>Sperm whale</b><br><i>Physeter macrocephalus</i>                                                                 | Not listed | Blue | S3S4: Special Concern/Apparently Secure     |                                   |
| <b>Merriam's shrew</b><br><i>Sorex merriami</i>                                                                     | Not listed | Red  | S1: Critically Imperilled                   |                                   |
| <b>Western water shrew <i>brooksi</i> subspecies</b><br><i>Sorex navigator brooksi</i>                              | Not listed | Blue | S2S3: Imperilled/Special Concern            |                                   |
| <b>American water shrew</b><br><i>Sorex palustris</i>                                                               | Not listed | Blue | S2S4: Imperilled/Apparently Secure          |                                   |
| <b>Preble's shrew</b><br><i>Sorex preblei</i>                                                                       | Not listed | Red  | S1S2: Critically Imperilled/Imperilled      |                                   |
| <b>Olympic shrew</b><br><i>Sorex rohweri</i>                                                                        | Not listed | Red  | S2: Imperilled                              | Inexact or uncertain numeric rank |
| <b>Trowbridge's shrew</b><br><i>Sorex trowbridgii</i>                                                               | Not listed | Blue | S3: Special Concern                         |                                   |
| <b>Tundra shrew</b><br><i>Sorex tundrensis</i>                                                                      | Not listed | Red  | S1: Critically Imperilled                   | Inexact or uncertain numeric rank |
| <b>Northern bog lemming <i>artemisiae</i> subspecies</b><br><i>Synaptomys borealis artemisiae</i>                   | Not listed | Blue | S2S3: Imperilled/Special Concern            |                                   |
| <b>Northern pocket gopher <i>segregatus</i> subspecies</b><br><i>Thomomys talpoides segregatus</i>                  | Not listed | Red  | S1S3: Critically Imperilled/Special Concern |                                   |
| <b>Meadow jumping mouse <i>alascensis</i> subspecies</b><br><i>Zapus hudsonius alascensis</i>                       | Not listed | Blue | S3: Special Concern                         |                                   |

Table S4: **American federal vs state listings:** Species classifications for mammals with distributions in Washington state, and their respective listings under ESA (federal legislation) and the Washington Species List (state legislation). Note: there are some instances where a specific subspecies is not listed, but the species is. See notes for specific details.

| Species                                                                                                                                                                                                                                                                                            | ESA status                                                                                     | Washington                                                   | Notes                                      |
|----------------------------------------------------------------------------------------------------------------------------------------------------------------------------------------------------------------------------------------------------------------------------------------------------|------------------------------------------------------------------------------------------------|--------------------------------------------------------------|--------------------------------------------|
| <b>Southern sea otter</b><br><i>Enhydra lutris nereis</i>                                                                                                                                                                                                                                          | Threatened                                                                                     | Subspecies not listed<br>but Sea Otter species<br>Threatened |                                            |
| <b>Canada lynx</b> <i>Lynx canadensis</i>                                                                                                                                                                                                                                                          | Threatened                                                                                     | Endangered                                                   |                                            |
| <b>Pocket gopher subspecies</b> <i>Thomomys mazama ssp.</i><br><ul style="list-style-type: none"> <li>- <i>glacialis</i></li> <li>- <i>pugetensis</i></li> <li>- <i>tumuli</i></li> <li>- <i>yelmensis</i></li> <li>- <i>couchi</i></li> <li>- <i>louiel</i></li> <li>- <i>melanops</i></li> </ul> | Threatened<br>Threatened<br>Threatened<br>Threatened<br>Not listed<br>Not listed<br>Not listed | Threatened                                                   |                                            |
| <b>Blue whale</b><br><i>Balaenoptera musculus</i>                                                                                                                                                                                                                                                  | Endangered                                                                                     | Endangered                                                   |                                            |
| <b>Fin whale</b> <i>Balaenoptera physalus</i>                                                                                                                                                                                                                                                      | Endangered                                                                                     | Endangered                                                   |                                            |
| <b>Sei whale</b> <i>Balaenoptera borealis</i>                                                                                                                                                                                                                                                      | Endangered                                                                                     | Endangered                                                   |                                            |
| <b>Sperm whale</b> <i>Physeter macrocephalus</i>                                                                                                                                                                                                                                                   | Endangered                                                                                     | Endangered                                                   |                                            |
| <b>North Pacific right whale</b> <i>Eubalaena japonica</i>                                                                                                                                                                                                                                         | Endangered                                                                                     | Endangered                                                   |                                            |
| <b>Grizzly bear</b> <i>Ursus arctos</i>                                                                                                                                                                                                                                                            | Threatened                                                                                     | Endangered                                                   |                                            |
| <b>Cascade red fox</b> <i>Vulpes vulpes cascadenis</i>                                                                                                                                                                                                                                             | Not listed                                                                                     | Endangered                                                   | Does not occur<br>outside of<br>Washington |
| <b>Western gray squirrel</b><br><i>Sciurus griseus</i>                                                                                                                                                                                                                                             | Not listed                                                                                     | Threatened                                                   | Occurs outside of<br>Washington            |

## References:

- (Department of Fish and Wildlife 2023) Department of Fish and Wildlife. 2023. WAC 220-610-110: *Endangered, threatened, and sensitive wildlife species classification*. Washington: Washington State Legislature.
- (ECCC 2014) ECCC. 2014. *Categories of species at risk: poster*. Available online: <https://www.canada.ca/en/environment-climate-change/services/species-risk-education-centre/poster.html> (accessed on 4th December 2023).
- (Harper et al. 1994) Harper, B., S. Cannings, D. Fraser, and W.T. Munro. 1994. Provincial lists of species at risk. In *Biodiversity in British Columbia*. Edited by L.E. Harding and E. McCullum. Delta, B.C.: Canadian Wildlife Service.
- (IUCN 2012) IUCN. 2012. *IUCN Red List categories and criteria: Version 3.1*. Second ed. Vol. iv, Gland, Switzerland and Cambridge, UK: IUCN.
- (IUCN 2022) IUCN. 2022. "Guidelines for using the IUCN Red List categories and criteria. Version 15.1.", edited by IUCN Standards and Petitions Subcommittee. Available online: <https://www.iucnredlist.org/documents/RedListGuidelines.pdf> (accessed on 2 August 2023).
- (Master et al. 2012) Master, L.L., D. Faber-Langendoen, R. Bittman, G.A. Hammerson, B. Heidel, L. Ramsay, K. Snow, A. Teucher, and A. Tomaino. 2012. "NatureServe Conservation Status Assessments: Factors for Evaluating Species and Ecosystem Risk." Arlington, VA: NatureServe.
- (NatureServe 2023) NatureServe. 2023. NatureServe Explorer. Available online: <https://explorer.natureserve.org/Search> (accessed on 2nd August 2023).
- (Office of Protected Resources 2023) Office of Protected Resources. 2023. Candidate Species under the Endangered Species Act. Available online: <https://www.fisheries.noaa.gov/endangered-species-conservation/candidate-species-under-endangered-species-act> (accessed on 4th December 2023).
- (SARA 2002) SARA. 2002. Species at Risk Act, S.C. c. 29. Available online: <https://laws.justice.gc.ca/eng/acts/s-15.3/> (accessed on 2nd August 2023).
- (Smith et al. 2018) Smith, David R., Nathan L. Allan, Conor P. McGowan, Jennifer A. Szymanski, Susan R. Oetker, and Heather M. Bell. 2018. Development of a Species Status Assessment Process for Decisions under the U.S. Endangered Species Act. *Journal of Fish and Wildlife Management* 9: 302-20. 10.3996/052017-jfwm-041.
- (USFWS 2017) USFWS. 2017. U.S. Fish & Wildlife Service: Candidate Species: Section 4 of the Endangered Species Act. Available online: <https://www.fws.gov/sites/default/files/documents/Candidate-Species.pdf> (accessed 2nd August 2023).
